# Supplementary material
Source: Springer Nature journal article supplement (https://www.springermedizin.de/resource/supplementary/12889_2012_6032_MOESM1_ESM.pdf/9494246)

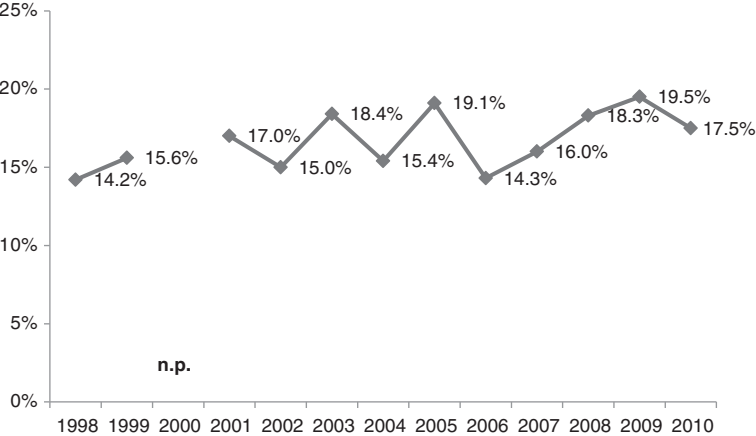

Supplement: MOESM1 [file 9494246]
